# Supplementary material for: Dual structure evolution of a Ag(i) supramolecular framework triggered by anion-exchange: replacement of terminal ligand and switching of network interpenetration degree
Source: Royal Society of Chemistry journal article supplement (doi:10.1039/c6cc05938d), 2016-01-01
Supplement: c6cc05938d1.pdf [file c6cc05938d1.pdf]

*Electronic Supplementary Information*

**Dual structure evolution of a Ag(I) supramolecular framework  
triggered by anion-exchange: replacement of terminal ligand  
and switching of network interpenetration degree**

**Cheng-Peng Li, Si Wang, Wei Guo, Yan Yan and Miao Du\***

*College of Chemistry, Tianjin Normal University, Tianjin 300387, P. R. China*

\* Corresponding author. E-mail: dumiao@public.tpt.tj.cn

***Chem. Commun.***

## Experimental section

**Materials and methods.** All starting materials and solvents were obtained commercially and used as received. The ligand L<sup>424</sup> was synthesized according to a literature procedure.<sup>1</sup> Fourier transform (FT) IR spectra (KBr pellets) were recorded in 400–4000 cm<sup>-1</sup> on an AVATAR-370 (Nicolet) spectrometer. Elemental analysis of C, H, and N was taken on a Leemanlabs CE-440 analyzer. Powder X-ray diffraction (PXRD) patterns were measured on a Rigaku D/max-2500 diffractometer with Cu K $\alpha$  radiation ( $\lambda = 1.5406 \text{ \AA}$ ), with a step size of 0.02° in  $2\theta$  and a scan speed of 2 °/min. The simulated PXRD patterns were calculated from the single-crystal X-ray diffraction data.

**[Ag(L<sup>424</sup>)(H<sub>2</sub>O)](NO<sub>3</sub>) (1 $\supset$ NO<sub>3</sub>).** A CH<sub>3</sub>OH solution (4 mL) of L<sup>424</sup> (30.1 mg, 0.1 mmol) was carefully layered onto a buffer of ethyl acetate (4 mL), below which a H<sub>2</sub>O solution (4 mL) of AgNO<sub>3</sub> (17.0 mg, 0.1 mmol) was placed in a straight glass tube. The tube was left to stand at room temperature in darkness. Colourless block crystals were observed on the tube wall after ca. three days. Yield: 51% (based on L<sup>424</sup>). Anal. Calcd for C<sub>17</sub>H<sub>14</sub>AgN<sub>7</sub>O<sub>4</sub> (1 $\supset$ NO<sub>3</sub>): C, 41.82; H, 2.89; N, 20.08%. Found: C, 41.55; H, 2.99; N, 20.11%. IR (cm<sup>-1</sup>): 3463b, 1640s, 1602m, 1563w, 1526w, 1444m, 1385vs, 1121m, 990w, 904w, 828m, 804w, 720m, 610m, 523m.

**[Ag(L<sup>424</sup>)(NO<sub>2</sub>)](H<sub>2</sub>O)<sub>1.5</sub> (1 $\supset$ NO<sub>2</sub>).** The single-crystal sample of 1 $\supset$ NO<sub>3</sub> was immersed in an aqueous solution (5 mL) of excess NaNO<sub>2</sub> (0.1 M) at room temperature. The solution was left to quietly stand for about ten days. The resulting colourless block crystals were determined as [Ag(L<sup>424</sup>)(NO<sub>2</sub>)](H<sub>2</sub>O)<sub>1.5</sub> by single-crystal diffraction. IR (cm<sup>-1</sup>): 3434b, 1595s, 1515w, 1467s,

---

1441s, 1270vs, 1067w, 1014w, 864w, 827s, 804m, 750w, 721s, 665w, 613m, 521w, 464w.

**[Ag(L<sup>424</sup>)(CF<sub>3</sub>COO)](H<sub>2</sub>O) (1 $\supset$ CF<sub>3</sub>COO).** The same procedure as that for 1 $\supset$ NO<sub>2</sub> was used except that NaNO<sub>2</sub> was replaced with CF<sub>3</sub>COONa, forming colourless block single crystals of [Ag(L<sup>424</sup>)(CF<sub>3</sub>COO)](H<sub>2</sub>O) as revealed by single-crystal diffraction. IR (cm<sup>-1</sup>): 3456b, 1666vs, 1604s, 1472m, 1449m, 1187s, 1129s, 1067m, 1005w, 832s, 794s, 753w, 719s, 662w, 613m, 522w, 468w.

**Single-crystal X-ray diffraction.** Data collection was carried out on a Bruker Apex II CCD diffractometer with Mo K $\alpha$  radiation ( $\lambda = 0.71073$  Å) at room temperature. A semi-empirical absorption correction (SADABS) was applied in each case and the SAINT program was used for integration of the diffraction profiles. The structures were solved by direct methods using the SHELXS program of SHELXTL and refined using SHELXL by full-matrix least-squares methods on  $F^2$  with anisotropic thermal parameters for all non-H atoms. In general, H atoms were determined geometrically and refined as ridings with isotropic displacement parameters. Further crystallographic details and selected bond parameters are listed in Table S1 and Table S2, respectively.

## Reference

1. M. H. Klingele and S. Brooker, *Eur. J. Org. Chem.*, 2004, 3422–3434.

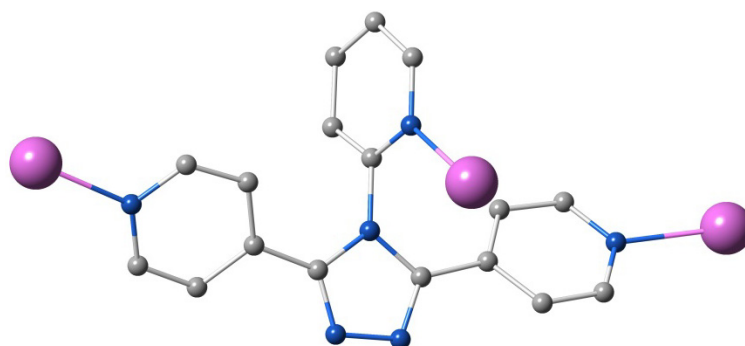

(a)

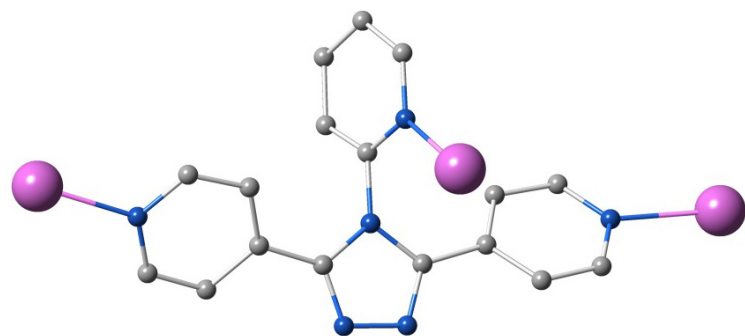

(b)

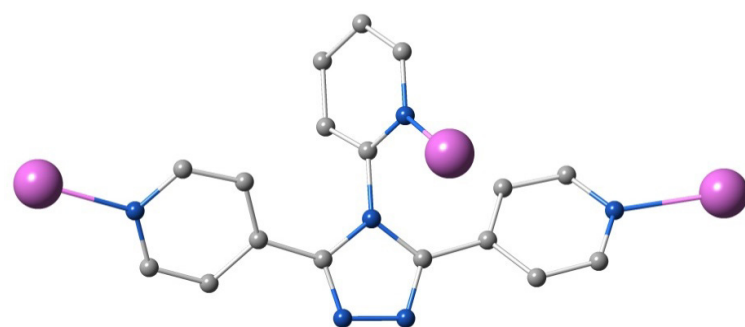

(c)

**Fig. S1** Coordination fashions of  $L^{424}$  ligands in (a)  $1\text{DNO}_3$ , (b)  $1\text{DNO}_2$  and (c)  $1\text{DCF}_3\text{COO}$ .

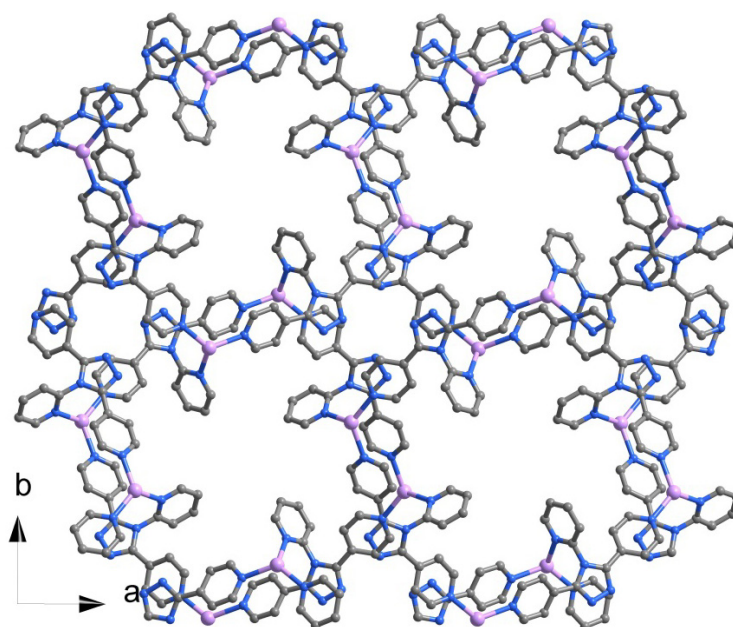

(a)

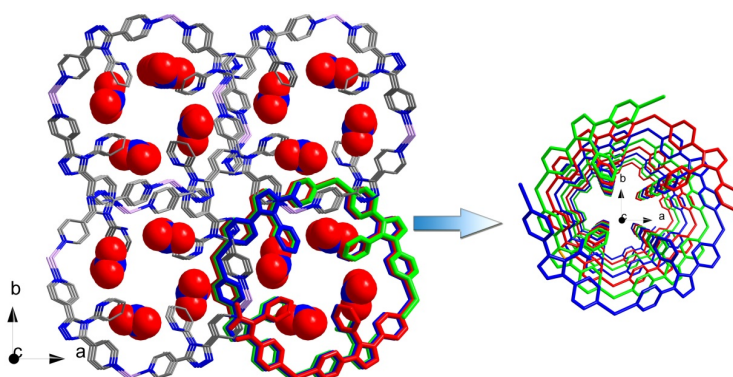

(b)

**Fig. S2** Crystal structure of  $1\text{DNO}_3$ . (a) One independent 3D open network. (b) Left: 3-fold interpenetrated framework with included nitrate anions shown in space-filling model. Right: Highlight of three entangled helical chains viewed along the *c* axis.

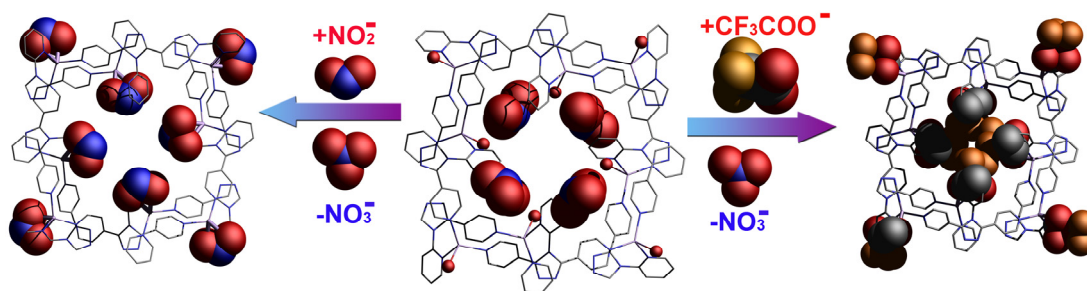

**Fig. S3** Dual SC-SC transformations between  $1DNO_3$  and  $1DNO_2$  or  $1DCF_3COO$ .

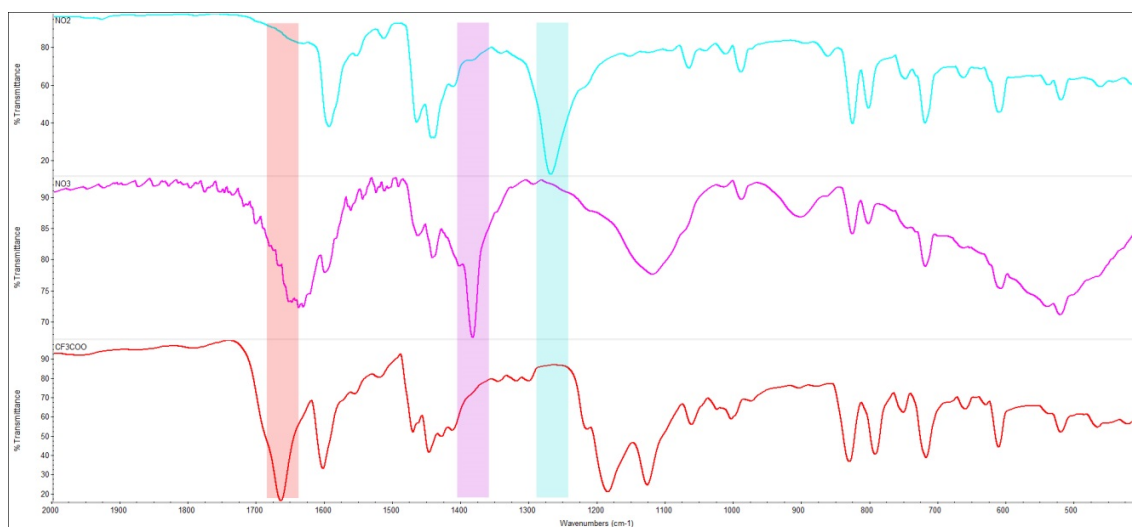

**Fig. S4** IR spectra of  $1DNO_2$ ,  $1DNO_3$  and  $1DCF_3COO$  (from top to bottom), in which the characteristic peaks of  $NO_2^-$  ( $1270\text{ cm}^{-1}$ ),  $NO_3^-$  ( $1385\text{ cm}^{-1}$ ) and  $CF_3COO^-$  ( $1666\text{ cm}^{-1}$ ) are highlighted with cyan, purple, and pink column, respectively.

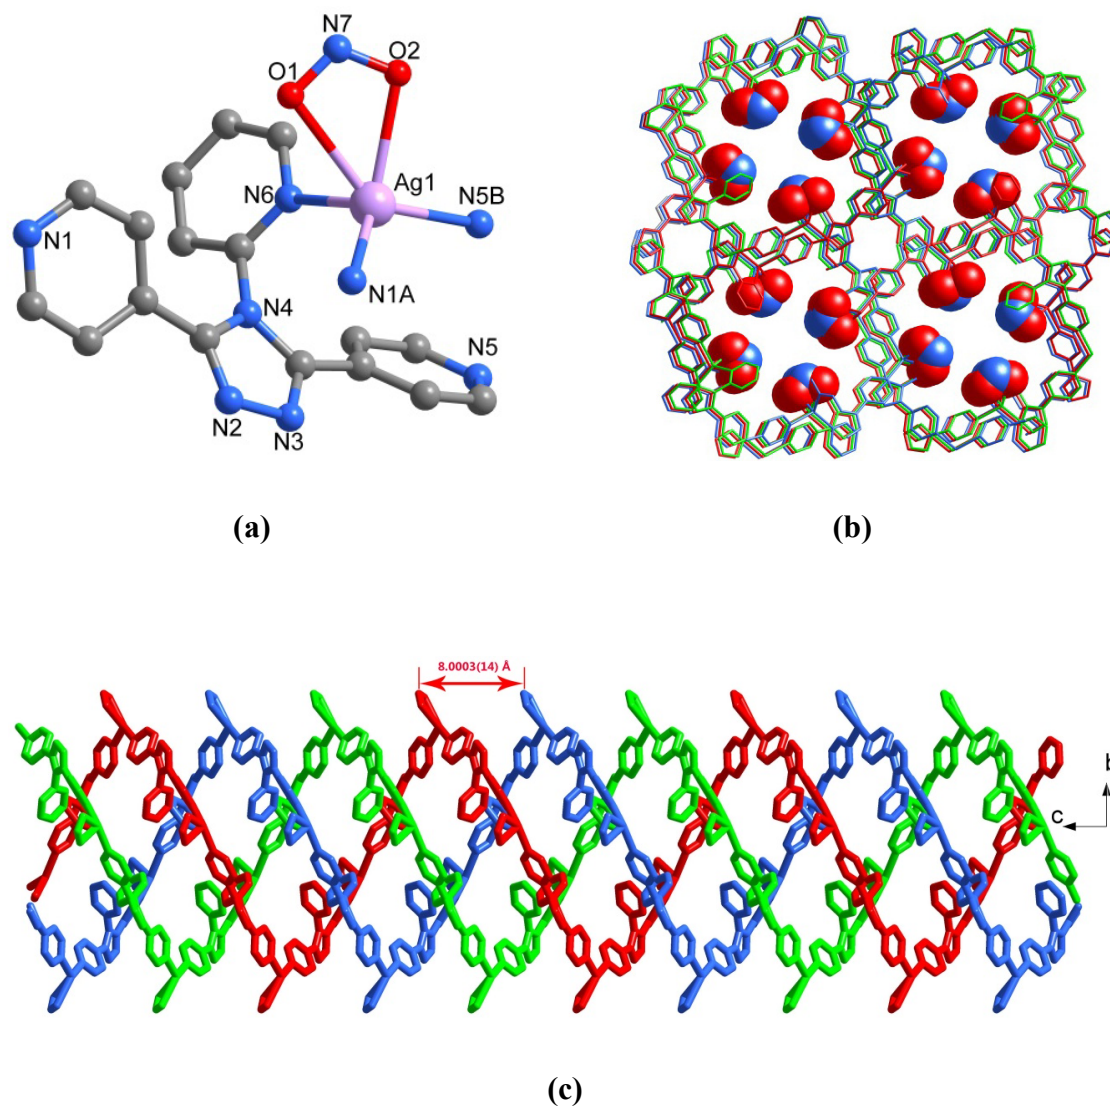

**Fig. S5** Crystal structure of  $1DNO_2$ . (a) Coordination geometry of  $Ag^I$  ion. (b) 3-fold interpenetrated structure with three independent networks shown in different colors and nitrite anions in space filling model. (c) Three entangled  $Ag-L^{424}$  helical chains with a separation of  $8.0003(14) \text{ \AA}$ , being equal to the length of  $c$  axis.

**Table S1** Crystallography data for **1**NO<sub>3</sub>, **1**NO<sub>2</sub> and **1**CF<sub>3</sub>COO.

| Compound reference                                                            | <b>1</b> NO <sub>3</sub>                                        | <b>1</b> NO <sub>2</sub>                                           | <b>1</b> CF <sub>3</sub> COO                                                   |
|-------------------------------------------------------------------------------|-----------------------------------------------------------------|--------------------------------------------------------------------|--------------------------------------------------------------------------------|
| Chemical formula                                                              | C <sub>17</sub> H <sub>14</sub> AgN <sub>7</sub> O <sub>4</sub> | C <sub>17</sub> H <sub>15</sub> AgN <sub>7</sub> O <sub>3.50</sub> | C <sub>19</sub> H <sub>14</sub> AgF <sub>3</sub> N <sub>6</sub> O <sub>3</sub> |
| Formula mass                                                                  | 488.22                                                          | 481.23                                                             | 539.23                                                                         |
| Crystal system                                                                | Tetragonal                                                      | Tetragonal                                                         | Tetragonal                                                                     |
| <i>a</i> /Å                                                                   | 31.370(3)                                                       | 31.065(3)                                                          | 22.8131(6)                                                                     |
| <i>b</i> /Å                                                                   | 31.370(3)                                                       | 31.065(3)                                                          | 22.8131(6)                                                                     |
| <i>c</i> /Å                                                                   | 7.8467(13)                                                      | 8.0003(14)                                                         | 7.7879(4)                                                                      |
| $\alpha$ /°                                                                   | 90.00                                                           | 90.00                                                              | 90.00                                                                          |
| $\beta$ /°                                                                    | 90.00                                                           | 90.00                                                              | 90.00                                                                          |
| $\gamma$ /°                                                                   | 90.00                                                           | 90.00                                                              | 90.00                                                                          |
| Unit cell volume/Å <sup>3</sup>                                               | 7721.8(16)                                                      | 7720.4(17)                                                         | 4053.1(3)                                                                      |
| Temperature/K                                                                 | 296(2)                                                          | 296(2)                                                             | 296(2)                                                                         |
| Space group                                                                   | <i>I</i> 4 <sub>1</sub> / <i>a</i>                              | <i>I</i> 4 <sub>1</sub> / <i>a</i>                                 | <i>P</i> 4 <sub>2</sub> / <i>n</i>                                             |
| <i>Z</i>                                                                      | 16                                                              | 16                                                                 | 8                                                                              |
| Absorption coefficient, $\mu$ /mm <sup>-1</sup>                               | 1.084                                                           | 1.081                                                              | 1.057                                                                          |
| No. of reflections measured                                                   | 18793                                                           | 19218                                                              | 20158                                                                          |
| No. of independent reflections                                                | 3381                                                            | 3428                                                               | 3588                                                                           |
| <i>R</i> <sub>int</sub>                                                       | 0.0248                                                          | 0.0357                                                             | 0.0509                                                                         |
| Final <i>R</i> <sub>1</sub> values ( <i>I</i> > 2σ( <i>I</i> ))               | 0.0379                                                          | 0.0309                                                             | 0.0400                                                                         |
| Final <i>wR</i> ( <i>F</i> <sup>2</sup> ) values ( <i>I</i> > 2σ( <i>I</i> )) | 0.1165                                                          | 0.0853                                                             | 0.0876                                                                         |
| Final <i>R</i> <sub>1</sub> values (all data)                                 | 0.0476                                                          | 0.0423                                                             | 0.0798                                                                         |
| Final <i>wR</i> ( <i>F</i> <sup>2</sup> ) values (all data)                   | 0.1310                                                          | 0.0917                                                             | 0.1110                                                                         |
| Goodness of fit on <i>F</i> <sup>2</sup>                                      | 1.094                                                           | 1.051                                                              | 1.026                                                                          |



**Table S2** Selective bond lengths (Å) and angles (°) for **1**NO<sub>3</sub>, **1**NO<sub>2</sub> and **1**CF<sub>3</sub>COO.

| <b>1</b> NO <sub>3</sub>     |            |            |            |
|------------------------------|------------|------------|------------|
| Ag1–N5                       | 2.235(3)   | Ag1–N1     | 2.291(3)   |
| Ag1–N6                       | 2.358(3)   | Ag1–O1     | 2.414(4)   |
| N5–Ag1–N1                    | 124.70(13) | N5–Ag1–N6  | 120.71(11) |
| N1–Ag1–N6                    | 101.18(12) | N5–Ag1–O1  | 102.96(15) |
| N1–Ag1–O1                    | 112.63(14) | N6–Ag1–O1  | 89.25(13)  |
| <b>1</b> NO <sub>2</sub>     |            |            |            |
| Ag1–N1A                      | 2.256(3)   | Ag1–N5B    | 2.353(3)   |
| Ag1–N6                       | 2.432(3)   | Ag1–O2     | 2.476(3)   |
| Ag–O1                        | 2.607(4)   |            |            |
| N1A–Ag1–N5B                  | 116.46(10) | N1A–Ag1–N6 | 120.45(9)  |
| N5B–Ag1–N6                   | 97.82(10)  | N1A–Ag1–O2 | 125.18(12) |
| N5B–Ag1–O2                   | 92.32(11)  | N6–Ag1–O2  | 98.19(11)  |
| O1–Ag1–O2                    | 47.98(12)  | O1–Ag1–N5B | 137.58(11) |
| O1–Ag1–N1A                   | 101.18(11) | O1–Ag1–N6  | 77.65(11)  |
| <b>1</b> CF <sub>3</sub> COO |            |            |            |
| Ag1–N1                       | 2.231(4)   | Ag1–N5     | 2.346(4)   |
| Ag1–N6                       | 2.447(4)   | Ag1–O2     | 2.356(5)   |
| N1–Ag1–N5                    | 115.80(15) | N1–Ag1–N6  | 118.92(14) |
| N5–Ag1–N6                    | 100.64(15) | N1–Ag1–O2  | 128.63(18) |
| N5–Ag1–O2                    | 95.05(19)  | N6–Ag1–O2  | 91.78(16)  |

Symmetry codes for **1**NO<sub>2</sub>: A =  $y - 1/4, -x + 1/4, -z + 9/4$ ; B =  $-x + 1/2, -y + 1/2, -z + 3/2$ .
